1 **Title:** Cyclic, condition-independent activity in primary motor cortex predicts corrective movement  
2 behavior

3 **Abbreviated Title:** Cyclic neural activity in corrective movements

4 **Author:** Adam G. Rouse<sup>1\*</sup>, Marc H. Schieber<sup>2</sup>, Sridevi V. Sarma<sup>3</sup>

5 **Affiliations:**

6 <sup>1</sup>Department of Neurosurgery, Department of Molecular and Integrative Physiology, University of Kansas  
7 Medical Center, Kansas City, KS, 66160

8 <sup>2</sup>Department of Neurology, Department of Neuroscience, Del Monte Institute for Neuroscience,  
9 University of Rochester Medical Center, Rochester, NY, 14642

10 <sup>3</sup>Department of Biomedical Engineering, Institute for Computational Medicine, Johns Hopkins  
11 University, Baltimore, MD, 21218

12 **Author Contributions:** AR and MS Designed research; AR Performed Research; AR and SS Analyzed  
13 data; AR, MS and SS Wrote the paper

14 **Corresponding Author and Lead Contact:** \*Please address correspondence to:

15 Adam G. Rouse

16 Department of Neurosurgery

17 University of Kansas Medical Center

18 3901 Rainbow Blvd, Mailstop 3021

19 Kansas City, KS 66160

20 E-mail: [arouse@kumc.edu](mailto:arouse@kumc.edu)

21 Figures: 7 figures and 3 tables in manuscript, 1 extended data item

22 **Word Counts:** Abstract 138, Significance Statement 80, Introduction: 681 words, Discussion: 1,388  
23 words

24 **Acknowledgements:** This work was supported by NIH NINDS K99/R00 NS101127.

25 **Conflict of Interest:** The authors declare no competing financial interests.

26

## 27 **Abstract**

28            Reaching movements are known to have large condition-independent neural activity and cyclic  
29 neural dynamics. A new precision center-out task was performed by rhesus macaques to test the  
30 hypothesis that cyclic, condition-independent neural activity in the primary motor cortex (M1) occurs not  
31 only during initial reaching movements but also during subsequent corrective movements. Corrective  
32 movements were observed to be discrete with time courses and bell-shaped speed profiles similar to the  
33 initial movements. Condition-independent cyclic neural trajectories were similar and repeated for initial  
34 and each additional corrective submovement. The phase of the cyclic condition-independent neural  
35 activity predicted the time of peak movement speed more accurately than regression of instantaneous  
36 firing rate, even when the subject made multiple corrective movements. Rather than being controlled as  
37 continuations of the initial reach, a discrete cycle of motor cortex activity encodes each corrective  
38 submovement.

## 39 **Significance Statement**

40            During a precision center-out task, initial and subsequent corrective movements occur as discrete  
41 submovements with bell-shaped speed profiles. A cycle of condition-independent activity in primary  
42 motor cortex neuron populations corresponds to each submovement, such that the phase of this cyclic  
43 activity predicts the time of peak speeds—both initial and corrective. These submovements accompanied  
44 by cyclic neural activity offer important clues into how we successfully execute precise, corrective  
45 reaching movements and may have implications for optimizing control of brain-computer interfaces.

## 46 **Introduction**

47            Corrective movements based on sensorimotor feedback are critical for elegant motor control.  
48 While a single, discrete movement like a pointing gesture may be mostly ballistic, more precise aiming  
49 movements typically require an error correction phase (Woodworth, 1899; Craik, 1947; Abrams et al.,  
50 1990; Sainburg et al., 1999; Elliott et al., 2010). In making an online correction, the brain must respond

51 to updated sensory information about the current position relative to the desired target. Yet the way  
52 neurons in motor areas of the brain encode and generate corrective movements to achieve movement  
53 precision is relatively unexplored. When examining populations of neurons in primary motor cortex  
54 during instructed movements, predictable dynamics of neural spiking occur with a progression from  
55 initiation to completion of a movement (Maynard et al., 1999; Jackson et al., 2003; Truccolo et al., 2005;  
56 Sarma et al., 2010). Yet behaving animals also respond to updated sensorimotor information, as happens  
57 in tasks that require precision. For corrective movements with new sensory information, does the neural  
58 activity update within a current active neural state as a continuation of the initial reach or does it repeat  
59 and cycle again through the same series of neural dimensions for each additional submovement?

60 We investigated the neural dynamics underlying corrective movements, focusing on two key  
61 features of neural activity in primary motor cortex that have been previously described during reaching: i)  
62 condition-independent neural activity and ii) rotations in neural dynamics. Although individual neurons  
63 in primary motor cortex encode a variety of condition-dependent movement features (Evarts, 1968;  
64 Thach, 1978; Georgopoulos et al., 1982; Kalaska et al., 1989; Kakei et al., 1999), there is also a large  
65 condition-independent component in the firing rate of neurons in motor cortex (Kaufman et al., 2016;  
66 Rouse and Schieber, 2018). Condition-independent neural activity is the change in a neuron's firing rate  
67 from baseline over time that happens regardless of the instructed movement for any given trial within a  
68 given task. Condition-independent activity presumably carries information on the timing of movement as  
69 opposed to specific, condition-dependent features. Techniques like demixed principal component  
70 analysis can partition a neural population's activity into condition-independent modulation and the more  
71 classically described condition-dependent tuning to task conditions (Kobak et al., 2016). In addition to  
72 being condition-independent or -dependent, changes in firing rate in theory might be temporally  
73 synchronous across a population. But in practice, primary motor cortex neurons have an asynchronous  
74 range of onset latencies before movement, with latencies for most corticomotoneuronal (CM) cells  
75 ranging from 120ms to 0ms (Cheney and Fetz, 1980) while other motor cortex neurons can lead

76 movement by up to 200ms (Moran and Schwartz, 1999). Because the increases and decreases in firing  
77 rates are not synchronous, the population activity forms a more complex trajectory in neural state space  
78 (Yu et al., 2007; Cunningham and Yu, 2014). These time-varying dynamics can either be dependent on  
79 specific task conditions or independent of task conditions. While the precise meaning of these features of  
80 neural dynamics under different conditions remains debated (Churchland et al., 2012; Hall et al., 2014;  
81 Michaels et al., 2016; Lebedev et al., 2019), these shifts between different combinations of active neurons  
82 leads to changing dimensions of the neural space.

83 We hypothesized that if the primary motor cortex handles online corrections as ongoing  
84 adjustments to a single reach, then one cycle of the neural trajectory would include both the initial and the  
85 corrective submovements. In contrast, if the primary motor cortex handles each correction as a distinct  
86 (albeit smaller) movement, then each corrective submovement would correspond to its own cycle  
87 repeating the series of neural dimensions that are traversed. We used a precision center-out task that  
88 required moving to small targets (either narrow or shallow) to elicit visuomotor corrections. We  
89 examined whether corrective movements in this task were simple adjustments in the ongoing reach or  
90 discrete submovements, behaviorally similar to initial movements. We then ask whether condition-  
91 independent activity—representing the time course of movement irrespective of its direction or  
92 amplitude—is similar for both initial and corrective submovements. Finally, we ask whether cyclic  
93 neural dynamics improve our predictions of when initial and corrective movements occur.

## 94 **Materials and Methods**

### 95 *Non-human primates*

96 Two male rhesus monkeys, P and Q (weight 11 and 10 kg, ages 7 and 6 years old, respectively),  
97 were subjects in the present study. All procedures for the care and use of these nonhuman primates  
98 followed the Guide for the Care and Use of Laboratory Animals and were approved by the University  
99 Committee on Animal Resources at the University of Rochester Medical Center, Rochester, NY.

100 *Experimental Design*

101 A precision center-out task was performed by the monkey, using an 18 cm handle attached to a  
102 commercial joystick (M212 series joystick, PQ Controls Inc.) to control a cursor on a 24" LCD display.  
103 The joystick handle moved freely with minimal resistance as the spring mechanism for providing  
104 centering, restorative force was removed. The end of the joystick could move approximately 9.3 cm in  
105 both the forward/backward and left/right directions. Motion of the joystick was transduced linearly by  
106 two Hall effect sensors sliding in both the backward/forward and left/right directions. The cursor viewed  
107 by the monkey directly represented the planar position of these two sensors scaled to fit within a 1000  
108 horizontal x 1000 vertical pixel workspace in the center of the LCD display. The limits of the cursor  
109 workspace were slightly within the physical limits of the joystick, with 110 pixels corresponded to  
110 approximately 1 cm of movement at the end of the joystick. The cursor appeared on the display as a  
111 small cross centered on a single pixel in the workspace. Custom software for task control sampled the  
112 joystick data, updated the scene, and stored the cursor position (equivalent to joystick position) and trial  
113 event times at 100 Hz.

114 The precision center-out task consisted of three sets of eight peripheral targets located  
115 equidistance and equally spaced in 45° intervals around a center, home target (see Figure 2). The center  
116 target had a radius of 75 pixels. Each center-out target—defined in polar coordinates—was one of three  
117 different sizes i) large targets spanning 45° of the workspace and covering 250-450 pixels from the center,  
118 ii) shallow targets spanning 45° but covering a width of only 325-375 pixels from the center, and iii)  
119 narrow targets spanning 15° covering 250-450 pixels from the center. All 24 targets (3 sizes x 8  
120 locations) were presented pseudo-randomly in equal amounts throughout a session.

121 For each trial, following the subject acquiring the home target and performing a required initial  
122 hold ranging from 300-500 ms, the instruction occurred with the given trial's correct target changing from  
123 black to green. Following this instruction, the monkey could move the cursor immediately to contact the  
124 correct target. At contact, the outline of all targets changed colors from white to black providing visual

125 feedback that the cursor was within the target boundaries. After contacting the desired target, the cursor  
126 was required to remain within the target for a variable hold time of 500-600 ms. If the cursor left the  
127 target during this hold, the monkey was allowed to enter the target again and complete a final hold. Once  
128 a successful final hold of 500-600 ms was completed, the animal received a liquid reward. Both the  
129 required initial and final hold times for each trial were randomly sampled from a uniform distribution.

### 130 *Neural Recordings*

131 Floating microelectrode arrays (MicroProbes for Life Science) were implanted in the anterior lip  
132 and bank of the central sulcus to record from primary motor cortex (M1) in each monkey, using methods  
133 described in detail previously (Mollazadeh et al., 2011; Rouse and Schieber, 2016). For monkey P,  
134 recordings were collected from six 16-channel arrays implanted in M1. For monkey Q, two 32-channel  
135 arrays and one 16-channel array in M1 were used. The location of the implanted arrays, spanning the  
136 forelimb representation in M1, have been previously reported (Fig. 2 of (Liu and Schieber, 2020)) and  
137 spanned the forelimb area of M1. Intracortical microstimulation on single electrodes with a current up to  
138 a maximum of 100  $\mu$ A (12 biphasic pulses, 0.2ms pulse width per phase, 3ms interpulse interval) with the  
139 animal lightly anesthetized with ketamine evoked a variety of forelimb movements. Of the 96 electrodes  
140 for monkey P, stimulation of 11 sites elicited proximal arm movements, 6 sites elicited wrist movements,  
141 and 21 sites elicited movement of the digits. Of the 80 electrodes for monkey Q, 34 sites were proximal,  
142 9 sites were wrist, and 25 were digits. During recording sessions, channels with spiking activity were  
143 thresholded manually online, and spike-waveform snippets and spike times were collected with Plexon  
144 MAP (Plexon, Inc.) and Cerebus (Blackrock Microsystems, LLC.) data acquisition systems. The spike  
145 snippets were sorted off-line with a custom, semi-automated algorithm. Chronic multielectrode arrays do  
146 not always yield well-isolated single-unit recordings. To define likely single units, we utilized the signal  
147 to noise ratio of the sorted spike waveforms and the percent of true single unit spikes estimated from a  
148 formula using the number of interspike interval (ISI) violations less than 1ms (Hill et al., 2011; Rouse and  
149 Schieber, 2016). Using a signal to noise ratio of  $SNR > 3$  and 100% true single unit spikes (no ISI

150 violations) to define definite single units and  $\text{SNR} > 2.5$  and  $>90\%$  true single unit spikes to define  
151 probable single units, 543 (monkey P) and 304 (monkey Q) of sorted spike waveforms were classified as  
152 definite single units while 268 (P) and 208 (Q) additional units were probable single units. Thus,  
153  $811/1293=63\%$  (monkey P) and  $512/1185 = 43\%$  (monkey Q) of all spiking units were classified as likely  
154 single units. Because the estimation of neural population states from multi-unit activity has previously  
155 been shown to be quite similar to that from well isolated single units (Trautmann et al., 2019) and because  
156 including multi-units would be unlikely to provide results more significant than similar numbers of  
157 single-units, we included both single- and multi-unit recordings in our analyses.

### 158 *Behavior Analyses*

159 A peak finding algorithm to identify local maxima was used for analysis of the timing of cursor  
160 speed peaks. Off-line, cursor speed was calculated by filtering the cursor position with a 10-Hz low-pass  
161 1<sup>st</sup>-order Butterworth filter (bidirectionally for zero phase lag) and then calculating the first derivative  
162 using the 5-point central difference. Local maxima of cursor speeds (identified with *findpeaks* function in  
163 Matlab (Mathworks, 2020)) were identified as peaks if they met the following criteria: i) the peak speed  
164 was greater than 250 pixels/s and ii) the peak's prominence—the height difference between the peak and  
165 the larger of the two adjacent troughs (minimum speed before encountering a larger peak)—was at least  
166 50% of the absolute height of the peak. All such cursor speed peaks with their surrounding  $\pm 200$  ms time  
167 windows were considered submovements within a trial. Initial peaks were identified as the first  
168 submovement that ended at least 150 pixels from the center (approximately halfway to the peripheral  
169 target). Any small movements before the initial speed peak—506 (4.6% of trials) for P and 616 (7.0% of  
170 trials) for Q—were discarded from further analysis. Speed peaks following the initial speed peak were  
171 defined as corrective submovements. To focus analysis on submovements made to successfully acquire  
172 the target, corrective submovements were only included if some portion of the acceleration phase—time  
173 from preceding speed trough to speed peak—occurred outside the peripheral target.

174           The speed profiles for individual submovements were analyzed between -200 and 200 ms relative  
175 to peak speed. As a measure of similarity between speed profiles, the Pearson's correlation between these  
176 speed profiles for pairs of submovements was calculated, yielding a similarity score between -1 and 1. To  
177 measure how similar corrective submovements were to initial submovements, the correlation of each  
178 initial submovement to a randomly selected corrective submovement was calculated. As a ceiling  
179 comparison, each initial submovement was also compared to another randomly selected initial  
180 submovement. Thus, the distribution of correlations for initial-corrective submovement pairs was  
181 compared to the distribution of initial-initial pairs.

### 182 *Identifying condition-independent, rotational neural activity*

183           We focused our neural population analysis on the neural dimensions that contained the most  
184 condition-independent, rotational activity. A schematic illustration of these two features—i) condition-  
185 independent vs. -dependent, and ii) synchronous vs. rotational/asynchronous is shown in Figure 1. The  
186 condition-independent activity is the time-varying average of firing rate across all trials regardless of  
187 condition while the condition-dependent is the specific tuning to task condition like target direction.  
188 Synchronous, time-locked activity represents changes in firing rate that happen simultaneously across the  
189 neural population, while asynchronous activity of varying time course in different neurons can lead to  
190 patterns of traveling waves or oscillations in the population with a predictable progression in time.

191           Firing rates of the neural population can be visualized as either: i) a function of time (Fig. 1B) or  
192 ii) neural trajectories in a Cartesian neural space where each neuron's firing rate is plotted on an  
193 orthogonal dimension (Fig. 1C). For a complex task with variable corrective submovements such as our  
194 precision center-out task, the condition-independent activity provides a useful analysis to identify the  
195 neural activity underlying a submovement. Although a synchronous rise and fall of firing rate across the  
196 neural population—a single neural dimension—may provide some information, utilizing additional neural  
197 dimensions of the condition-independent signal may help improve our prediction of the timing and phase  
198 of submovements. The simplest is to consider two-dimensions of condition-independent activity in which



199 the rotational activity resulting from sequential firing rate changes across different neurons produces a  
 200 cycle in a neural plane. This approach has the potential to improve identification of corrective  
 201 submovements.

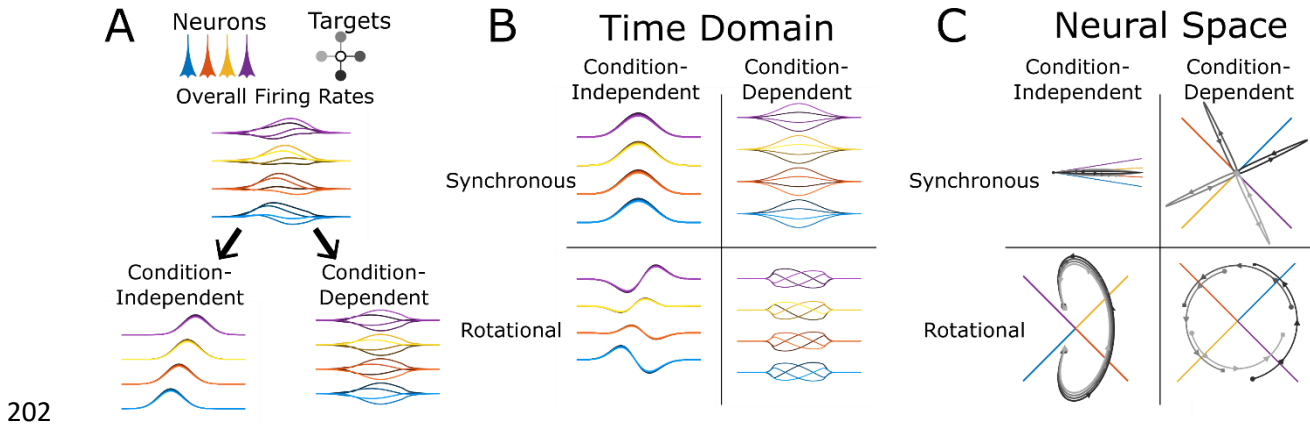

202  
 203 Figure 1. Idealized representation of both the synchronous and rotational components of condition-  
 204 independent and -dependent changes in neuronal firing rate. A) The firing rates for four neurons (blue,  
 205 orange, yellow, and purple) are shown for reaches to four target directions (light to dark grayscale). The  
 206 overall firing rates differ for both the four neurons and the four target condition. By time averaging  
 207 across the four conditions, the condition-independent firing rates and the residual condition-dependent  
 208 firing rates are both identified. B) Next, averaging across the population reveals that firing rates are i)  
 209 synchronous activity across all neurons at each time point and ii) the remaining, asynchronous/rotational  
 210 firing rate changes specific for each neuron. C) The neural space visualizes the population activity by  
 211 showing each neuron's firing rate as a point along an orthogonal dimension with time represented as a  
 212 trajectory through this space. In this representation, the difference between synchronous and rotational  
 213 activity is better appreciated. Synchronous activity is movement along a single neural dimension while  
 214 rotational activity is movement between dimensions. Note, the dimensions defined by individual neurons  
 215 are shown projected in a 2D plane. Only the given component (synchronous/rotational and condition-  
 216 independent/-dependent) are shown for these four example neurons for visualization purposes. In a much  
 217 higher dimensional space when recording from a large number of neurons, the possibility of finding  
 218 dimensions with little overlap between components is much greater.

### 219 *Dynamical Systems Model*

220 Traditionally, condition-independent signals are identified by aligning neural data to behavioral  
 221 cues and time averaging with methods like dPCA (Kaufman et al., 2016; Ames and Churchland, 2019).

222 However, our precision center-out task consisted of corrective movements that were highly variable in  
223 their timing relative to any experimental controlled behavioral event. We therefore employed dynamical  
224 system modeling to characterize repeated changes in firing rates across our recorded neural population.  
225 To identify and analyze potential repeatable temporal dynamics of the neural population that correlated  
226 with movement, our neural data was modeled as a linear, time-invariant system using a system of coupled  
227 first-order ordinary differential equation defined by a transform matrix. This model was built using only  
228 the condition-independent activity by averaging the firing rates for individual spiking units across all  
229 trials regardless of the movement condition (i.e. target location).

230 The condition-independent activity was then submitted to jPCA (Churchland et al., 2012) to  
231 identify the two-dimensional neural plane with the most rotational/cyclic activity. In this model, the  
232 changes in firing rate can grow/shrink along a single dimension (synchronous) as well as rotate across  
233 dimensions (asynchronous). The eigen decomposition of the transform matrix yields eigenvalues with the  
234 real part representing growing or shrinking away from the origin while the imaginary part represents  
235 rotations. Note, this utilization of the jPCA algorithm on only the condition-independent activity is  
236 different than the typical application of jPCA to data containing the condition-dependent activity.  
237 Additionally, we find the results of the dynamical system are more stable when the firing rates are square-  
238 root transformed to equalize variance between high and low firing rates (Kihlberg et al., 1972; Snedecor  
239 and Cochran, 1980; Ashe and Georgopoulos, 1994) and thus performed this transform before submitting  
240 firing rates to jPCA.

241 We call the plane with the most rotation the condition-independent (CI) plane and define the two  
242 neural dimensions that define this plane as CIx and CIy. To consistently define CIx and CIy across  
243 recording sessions and monkeys, we defined the +CIx direction as the neural dimension that had the  
244 maximum average firing rate. This was performed by calculating the population averaged firing rate at  
245 all angles in the plane and rotating the CIx and CIy axes so that +CIx aligned with the largest firing rate.  
246 Having identified this jPC neural plane, our work introduces a new analytic variable—condition-

247 independent phase ( $CI\phi$ )—which estimates the instantaneous phase angle within this two-dimensional  
248 plane of the projected population firing rates. We calculate  $CI\phi$  using the Hilbert transform applied to the  
249 two signals,  $CIx$  and  $CIy$ , generating a complex, analytical representation of the population signal. The  
250 angle of this complex signal is then used to calculate the instantaneous phase.

251         Since our task consisted of highly variable trial lengths and timing, the identification of  
252 condition-independent activity by time averaging based upon behavioral events was challenging. To be  
253 less constrained in identifying the plane with condition-independent rotational activity, we used an  
254 iterative approach alternating between identifying the  $CI\phi$  for each time point and then averaging the  
255 condition-independent neural activity for each  $CI\phi$  value. We first time-averaged the activity aligned on  
256 speed peaks, and then initially performed jPCA on the time-averaged data. After identifying the rotational  
257 plane, we then binned and averaged the firing rates based on its phase in the plane (rather than time) and  
258 performed jPCA on this new phase-averaged neural activity. This calculation of the jPCA plane and  
259 phase averaging was repeated for three iterations to ensure convergence. The Matlab code and additional  
260 documentation about the calculation of  $CI\phi$  as described in the paper is freely available online at  
261 <https://github.com/arouseKUMC/CIphase>. The code is also available as Extended Data 1.

262         The calculation of the jPC plane and the  $CI\phi$  was performed using 5-fold cross-validation. Each  
263 recording session was divided into 5 testing sets of trials each containing 20% of the data. The jPC plane  
264 was calculated by training on the other 80% of the data and then tested on each test set. All presented  
265 results for  $CI\phi$  are using the test data projected into the jPC dimensions identified by the separate training  
266 set.

### 267 *Firing Rate vs. Speed Model*

268         For comparison with our two-dimensional CI plane and phase analysis, we wanted to examine  
269 how well a linear predictor of speed using a single neural dimension could perform. We therefore  
270 performed linear regression to predict speed from the recorded neural firing rates. For this estimate, we

271 regressed the firing rates for all recorded units to peak speed for all submovements. We utilized the firing  
272 rates for each recorded unit averaged across a time window from 300 ms before to 100 ms after each peak  
273 speed. We chose this method to identify a neural dimension that correlated with speed without using  
274 separate time lags for each individual neuron. For motor cortex, the neural signal in this dimension would  
275 be expected to increase and peak before each peak in movement speed. We identify and report the time at  
276 which the peaks in this neural signal occurred to quantify how accurately the timing of peaks in  
277 movement speed was predicted.

### 278 *Statistics*

279         Several statistical analyses (Table 1) were used to assess how similar corrective submovements  
280 were to initial submovements and whether there were repeated cycles of neural activity and if these cycles  
281 corresponded to behavior. For correlations between submovement speed profiles, movement times, and  
282 average spike times, non-parametric tests were used. Since CI $\phi$  values represent an angle ranging from  $-\pi$   
283 to  $\pi$ , circular distribution statistics—mean, variance, correlation, and Rayleigh test for non-uniformity—  
284 were used. All circular statistics were calculated with CircStat, a Circular Statistics Toolbox for Matlab  
285 (Berens, 2009).

286

287

288

289

290

291

292

293 Table 1. Statistical tests and confidence intervals reported throughout this study referenced with letter  
 294 superscripts.

|   | Data Structure                                                                               | Type of test                                           | Confidence intervals                                        |
|---|----------------------------------------------------------------------------------------------|--------------------------------------------------------|-------------------------------------------------------------|
| a | Correlation between speed profiles from -200 to 200 ms relative to peak speed, nonparametric | Wilcoxon rank sum test                                 | [25 <sup>th</sup> , 75 <sup>th</sup> ] percentiles          |
| b | Initial vs. Corrective movement times, nonparametric                                         | Two-sided Wilcoxon rank sum test                       | Percentage of submovements within 100-350 ms                |
| c | Initial vs. Corrective Average spike times between -200 to 100ms, nonparametric              | Spearman's rank correlation                            | 95% confidence interval by bootstrapping (1000 repetitions) |
| d | Circular distribution of phase                                                               | Rayleigh test                                          | Circular standard deviation                                 |
| e | CI $\phi$ -angle Speed – linear random variable                                              | Circular correlation between angle and linear variable | Minimum and maximum across 12 recording sessions            |
| f | Ratio of Standard deviations of times estimated with CI $\phi$ and Firing rate model         | F-test                                                 | 95% confidence interval                                     |

295

## 296 Results

### 297 *Motor behavior – initial and corrective submovements*

298 Movement speed was analyzed throughout the center-out task from instruction until successful  
 299 completion of the final target hold. The two monkeys successfully completed 10,963 (monkey P) and  
 300 8,737 (monkey Q) trials across 12 recording sessions each. In addition to the peaks in speed with the

301 initial reach after instruction, additional peaks in speed were observed and labeled as corrective  
302 submovements. There were 6478 and 3912 corrective submovements identified for monkeys P and Q,  
303 respectively. Across all trials, 68.3% (P) and 71.1% (Q) were completed in a single initial movement,  
304 17.5% (P) and 20.3% (Q) of trials were completed with one additional corrective submovement, and  
305 14.2% (P) and 8.6% (Q) of trials required two or more corrective submovements. The location of the  
306 identified speed peaks within example trials and the speed profiles for monkey P are shown in Figure 2A  
307 and 2B, respectively. The speed peaks tended to be distinct with nearly zero velocity between most  
308 peaks. As shown in Figure 2C, 99.0% (P) and 97.7% (Q) of the minimum speed trough following the  
309 initial speed peak were less than 20% of the peak. Similarly, 82.4% (P) and 85.8% (Q) of the troughs  
310 were less than 20% of the preceding peak between sequential corrective speed peaks. The mean peak  
311 speeds for initial submovements were 1533 (P) and 1182 (Q) pixels/s while corrective submovement peak  
312 speeds were 460 (P) and 400 (Q) pixels/s. Thus, the average peaks for corrective submovements were  
313 30.0% and 33.8% of initial submovements, and a low-speed trough almost always occurred between two  
314 speed peaks making it reasonable to analyze submovements defined by their peak speeds.

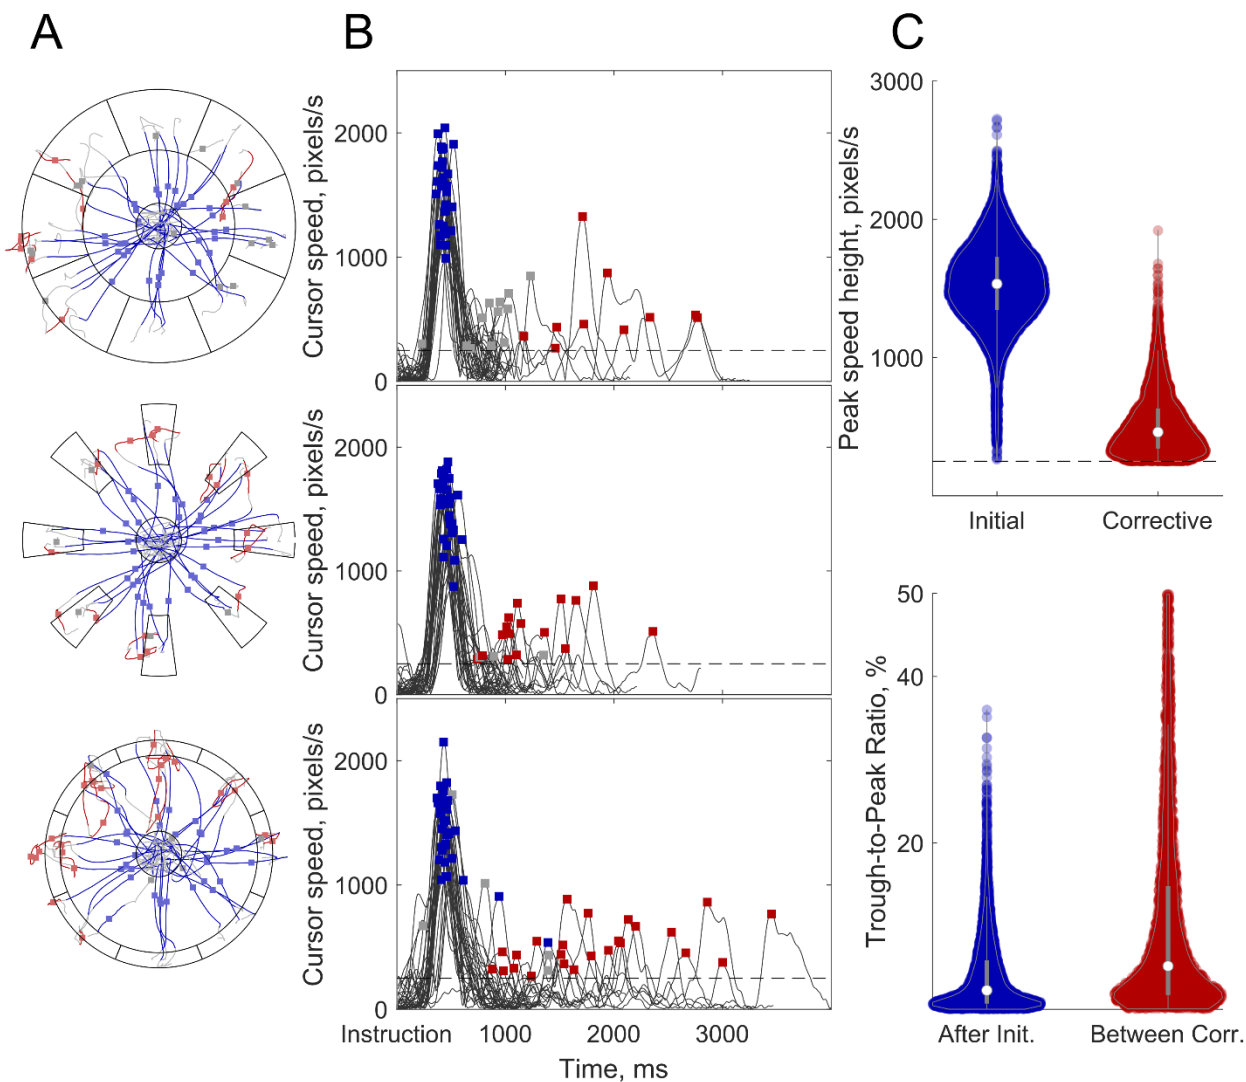

315

316 Figure 2. The precision center-out task. A) Cursor paths for four example trials to each target for the  
317 three target sizes: regular (top), narrow (middle), shallow (bottom). Initial submovements from 200ms  
318 before to 200ms after speed peaks are plotted in blue with the point when peak speed occurred shown  
319 with a blue dot. Corrective movements are similarly identified in red with a red dot. Grey lines connect  
320 the rest of a trial before, between, or after submovements with a speed peak. B) Cursor speed plotted  
321 versus time for a subset of trials. Initial (blue) and corrective (red) submovement speed peaks are  
322 identified with squares. Gray squares identify speed peaks that were thrown out because they i) were  
323 small initial movements that did not move outside the center or ii) occurred entirely within the peripheral  
324 target. C) Top) Distribution of peak speeds for initial (blue) and corrective (red) submovements. Bottom)  
325 Distribution of the trough-to-peak ratio for the troughs following an initial submovement before a

326 corrective submovements and following a corrective submovement before another corrective  
327 submovement. Data is shown for monkey P. Data for monkey Q, which had similar results, is not shown.

328         The speed profiles were time aligned to peak speed to better examine the identified  
329 submovements (Figure 3A). Almost all submovements show a clear bell-shaped profile for both the  
330 initial and corrective movements. The similarity between initial and corrective speed profiles was  
331 assessed by using the correlation between randomly selected pairs of movements. For random pairs  
332 (irrespective of trial) of one initial and one corrective submovement, the median correlation was 0.78  
333 [0.58 0.89] (monkey P) and 0.83 [0.70, 0.90] (monkey Q). Thus, the shape of corrective submovements  
334 was significantly correlated with the shape of initial submovements ( $p < 0.001^a$ ). As a ceiling comparison,  
335 the correlation between randomly selected pairs of initial submovements was observed to be 0.93 [0.86  
336 0.96] (P) and 0.91 [0.80, 0.96] (Q). Even though the shape of initial-corrective pairs was significantly  
337 less correlated than the initial-initial pairs, corrective submovements still had a similarity measure that  
338 was a large percentage—84% (0.78/0.93) and 91% (0.82/0.91)—of that observed for initial-initial pairs.

339         The time duration and timing of submovements was also examined. The onset and offset of  
340 submovements were defined as the time points when speed was one-half of the maximum speed both  
341 before and after the speed peak. As shown in Figure 3B, the movement duration at half maximum speed  
342 was similar and close to symmetric for both initial and corrective submovements. The initial  
343 submovements were slightly longer having a median time of 220ms (P) and 270ms (Q) compared to  
344 corrective submovements with medians of 180ms (P) and 220ms (Q). This difference in median  
345 movement times was statistically significant ( $p < 0.001^b$ ) but the difference of 40 and 50ms was small,  
346 especially given the peak speed was only one-third the magnitude for the smaller corrective movements.  
347 Overall, all submovement durations, as measured by the full width at half maximum, occurred within a  
348 similar range with 96.7%/88.0% (P/Q) of all initial and 96.3%/93.0% (P/Q) corrective submovements  
349 between 100-350 ms. The time between speed peaks—either initial to first corrective submovements or  
350 between subsequent corrective submovements—is plotted in Figure 3C. The median time between peaks



351 were 570 ms for monkey P and 700 ms for monkey Q with the mode time between peaks being 450ms (P)  
352 and 550ms (Q). Only 3.2% (P) and 0.1% (Q) of speed peaks had a time between peaks less than 200ms  
353 and 6.1% (P) and 10.0% (Q) of speed peak pairs had times greater than 1200 ms. These observations  
354 suggest the movement behavior could be divided into submovements with similar bell-shaped velocity  
355 profiles and similar time durations.

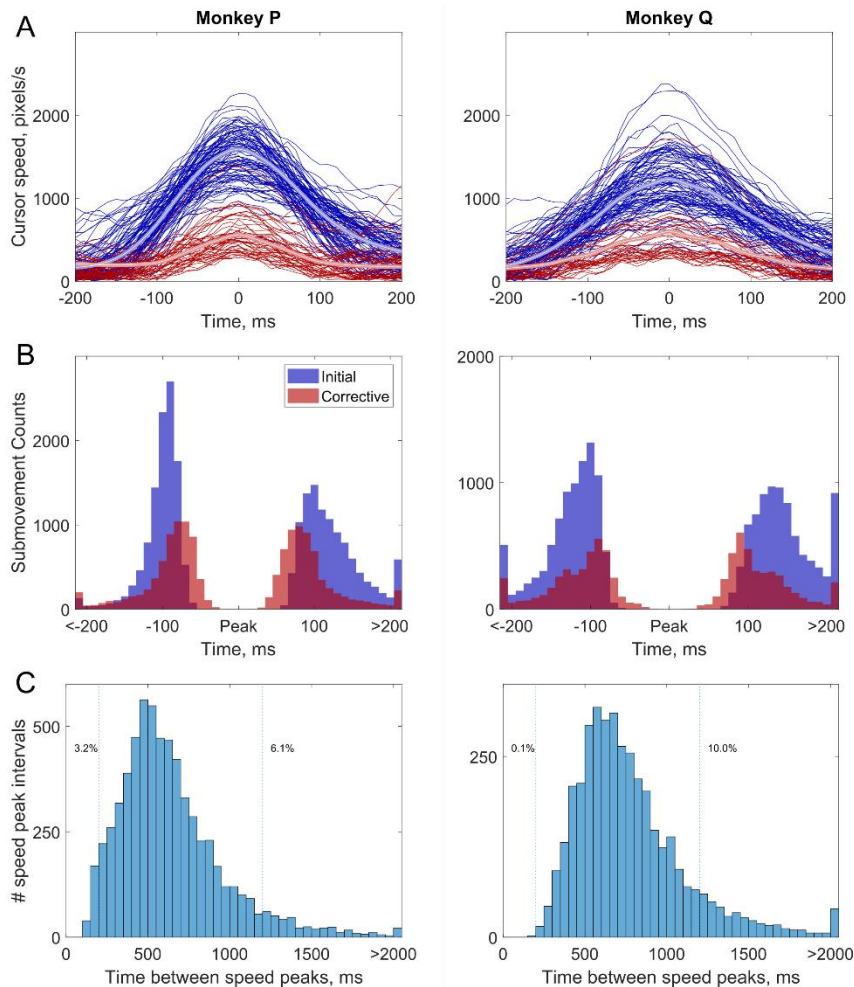

356

357 Figure 3. Time course of submovements. A) The cursor speeds are plotted aligned to speed peaks for  
358 initial (blue) and corrective (red) submovements. N.B. The cursor speeds shown are before the bandpass  
359 filter used for identifying peaks displayed in Figure 1B. Thus, the maximum of each trace may not align  
360 exactly with the plotted peak speed. B) Histogram of the time at half-maximum speed before and after  
361 peak speed for all initial (blue) and corrective (red) submovements. C) The time duration between speed

362 peaks including the times from initial submovement to first corrective submovement as well as between  
363 any consecutive pairs of corrective submovements.

364

### 365 *Consistent Timing of Neural Firing Rates for Initial and Corrective Submovements*

366 Single target acquisition movements thus often consisted of initial and corrective submovements  
367 with similar temporal characteristics. Did neural activity in the primary motor cortex control such target-  
368 acquisition movements as a single movement, or as a series of discrete submovements? The neural firing  
369 rates across the recorded population were time aligned to the submovement speed peaks to examine the  
370 firing rates from 500 ms before until 300 ms after the peak speed. The average firing rate (smoothed with  
371 a Gaussian window,  $\sigma=30\text{ms}$ ) for all analyzed units aligned to the peak speed for initial and corrective  
372 submovements are shown in Figure 4A. A clear peak occurs before the peak speed for both initial and  
373 corrective submovements in both monkeys. Monkey P's peak firing rates occurred 170 ms and 120 ms  
374 before initial and corrective submovements, respectively, while monkey Q's occurred at 160 and 160 ms  
375 before for both initial and corrective submovements. Thus, firing rates increased and peaked globally for  
376 corrective submovements in addition to the initial reach.

377 If all neurons had the same time lag preceding the upcoming peak in movement speed, there  
378 would be a synchronized increase and decrease of all condition-independent firing rates simultaneously.  
379 However, when examining average firing rates from 10 example neurons from one recording session  
380 from monkey P, all aligned to peak speed, we see heterogenous timing of firing rates relative to the peak  
381 speed (Figure 4B). This relationship tended to be conserved across initial and corrective movements,  
382 with the purple spiking units tending to fire earlier and the orange units later for both initial and corrective  
383 submovements. This suggests that the condition-independent neural activity across the neurons might  
384 form a repeatable temporal structure—a neural trajectory—that is more than a simple simultaneous rise  
385 and fall in firing rate across the population

386 To quantify the early versus late consistency of spiking units, we calculated the average time of  
387 all spikes that occurred within a window from -200ms before to 100ms after peak speed to determine  
388 whether a unit tended to increase its firing rate earlier (negative time) or later (positive time) relative to  
389 peak speed. We then compared these average spike times for initial versus corrective submovements for  
390 each spiking unit. As shown in Figure 4C, earlier firing units (more negative) for initial submovements  
391 tended to fire earlier for corrective submovements, while units later (more positive) for initial  
392 submovements also tended to fire later for corrective submovements. This correlation was significant for  
393 all spiking units with Spearman correlations of  $\rho = 0.40$  [0.35, 0.45] (P) and  $\rho = 0.58$  [0.53, 0.62] (Q),  
394  $p < 0.001^c$ . Using only single units, the Spearman correlations were  $\rho = 0.37$  [0.31, 0.44] (P) and  $\rho = 0.61$   
395 [0.54, 0.68] (Q),  $p < 0.001^c$ . Thus, a significant portion of the ordered timing of units was conserved  
396 relative to peaks in movement speed for both initial and corrective submovements.

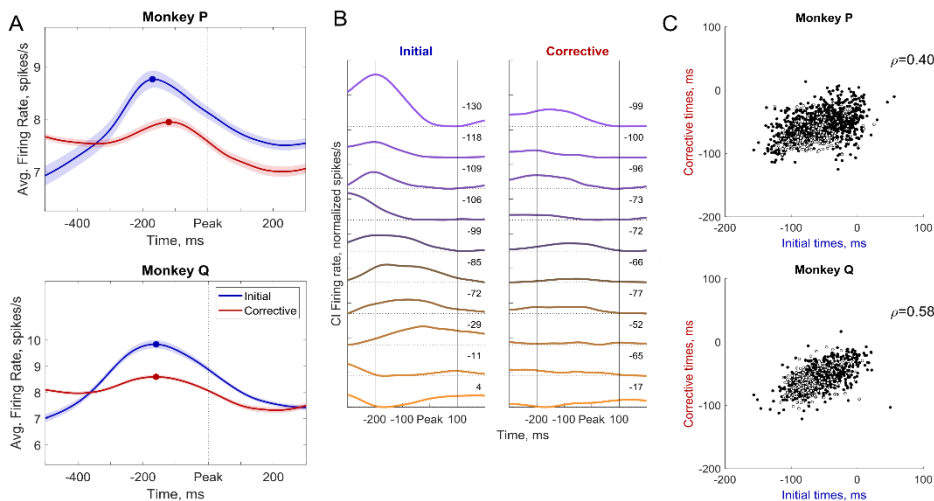

397  
398 Figure 4. Neural firing relative to initial and corrective submovements. A) The firing rate for all spiking  
399 units was averaged for all initial (blue) and corrective (red) submovements. The shaded region interval  
400 shows the 95% confidence interval of the calculated mean for all spiking units. Circles indicate the time  
401 of peak firing rate for each condition. B) Average condition-independent firing rates for 10 example  
402 spiking units recorded simultaneously from monkey P time-aligned relative to peak speed for all initial  
403 (left) and corrective (right) submovements. Firing rates are shown relative to the average firing rate  
404 within the given time window (initial or corrective) for each spiking unit. The weighted timing of spikes  
405 (in ms) within the -200ms to 100ms window is given for each unit. Units are colored based on the initial

406 movement by whether their firing rates were greater early (purple) or late (orange). C) Weighted timing  
407 of spiking relative to peak speed for each unit for initial (abscissa) and corrective (ordinate)  
408 submovements. More negative times represent spiking earlier relative to the peak speed of each  
409 submovement. Single units are shown with filled circles while all other spiking multi-units are shown  
410 with open circles.

411

#### 412 *Consistent Neural Dynamics for Initial and Corrective Submovements*

413 We next wanted to examine whether these repeatable neural patterns that occurred on average  
414 across all movements could be used to identify submovements on individual trials. Despite the smaller  
415 magnitude of the condition-independent neural activity during corrective movements, the repeated  
416 oscillations in speed and repeated neural dynamics suggested a portion of neural activity was repeatable  
417 and common to initial and corrective submovements. To examine this, we built a simple linear dynamical  
418 system model using the neural firing rates from the entire trial—including both initial and corrective  
419 submovements—to characterize common temporal dynamics that might be present. The neural firing  
420 rates were again averaged across all conditions, i.e. movement directions, and both initial and corrective  
421 portions of the trials so the dynamical system model would identify common condition-independent  
422 activity. Using the jPCA algorithm described in Churchland et al. (2012), i) the first six principal  
423 components of the neural space and ii) the two dimension plane within the space of those six principal  
424 components that captured the most rotational neural activity were identified. We labeled the two neural  
425 dimensions of the plane with the most rotational condition-independent activity as CI<sub>x</sub> and CI<sub>y</sub>. To  
426 consistently define CI<sub>x</sub> and CI<sub>y</sub> across recording sessions and monkeys, we aligned the +CI<sub>x</sub> direction  
427 with the neural dimension that had the maximum average firing rate in the plane. This was performed by  
428 calculating the average firing rate across all spiking units for neural activity based on each timepoint's  
429 angle in the CI<sub>x</sub>/CI<sub>y</sub> plane (binned in 100 angle intervals) and rotating the CI<sub>x</sub> and CI<sub>y</sub> axes so that +CI<sub>x</sub>  
430 aligned with the angle with largest firing rate. This alignment results in the +CI<sub>x</sub> dimension closely

431 aligning with the time course of the global average firing rate across the population (shown in Fig 4A)  
432 while CIy is an orthogonal neural dimension that oscillates with a phase lag of  $\pi/2$  compared to CIx.

433         The average firing rates projected in our identified CI plane for all initial and corrective  
434 submovements are shown in Figure 5, where the neural data was again aligned relative to peak speed for  
435 initial and corrective submovements separately. The neural trajectory in the 2-dimensional CIx/CIy plane  
436 are shown in Figure 5A, while the same CIx and CIy dimensions are plotted as a function of time in  
437 Figure 5B. The initial and corrective neural trajectories (Fig. 5A) are very similar in their shape and  
438 direction of rotation within the plane, with the trajectories for corrective submovements appearing as an  
439 additional cycle resembling a smaller, scaled version of the larger trajectories for initial submovements  
440 moving from the -CIy to +CIx to +CIy to -CIx dimensions. The time courses of CIx (solid) and CIy  
441 (dashed) (Fig. 5B) were similar for initial (blue) and corrective (red) submovements, though they differed  
442 in magnitude. The peak in the CIx dimension (denoted with an X)—defined as the dimension in the plane  
443 that best correlated with the global average firing rate of the population—occurred approximately 150 ms  
444 before peak speed for initial and corrective submovements, whereas the peak in the CIy dimension (also  
445 denoted with an X) occurred near the time of peak speed for both submovement types.

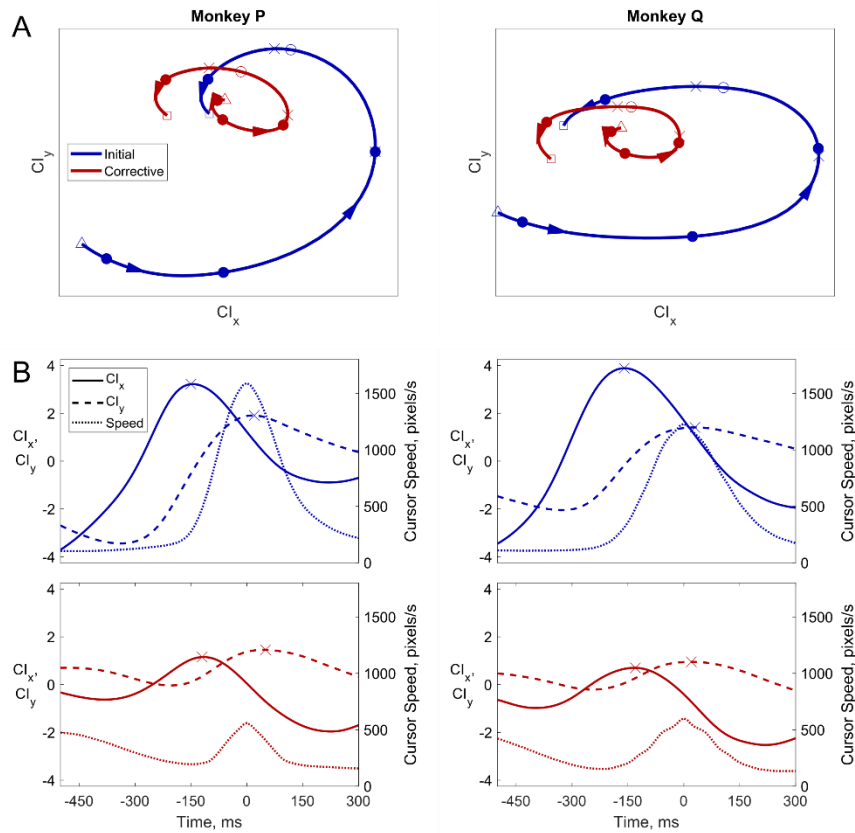

446

447 Figure 5. Cyclic neural dynamics related to initial and corrective submovements. A) The average  
448 population firing rates for initial (blue) and corrective (red) submovements are projected in the  $CI_x/CI_y$   
449 plane identified with jPCA. The trajectories start at the triangles and end at the squares. Each filled circle  
450 is a 150 ms time step and the open corresponds to peak speed. C). Average  $CI_x$  (solid lines) and  $CI_y$   
451 ( $CI_y$  (dashed lines) plotted as a function of time relative to average cursor speed (dotted lines).

452

### 453 *Neural cycles improve predictions of behavioral timing*

454 Since the population firing rates in the CI plane appeared to cycle across the two dimensions with  
455 similar timing for initial and corrective submovements, despite different magnitudes, we next chose to  
456 examine the instantaneous phases of  $CI_x$  and  $CI_y$  activity to see if it was a statistically significant marker  
457 of the neural state of motor cortex and its relationship with upcoming movement. We used a Hilbert  
458 transform to create an analytic representation of the  $CI_x$  and  $CI_y$  signals and then calculated the  
459 instantaneous phase by taking the angle between the real component and the Hilbert transformed

460 imaginary component. The average phase of CIx and CIy for both initial and corrective submovements—  
461 time aligned to peak speed—is shown in Figure 6A. The phase of CIx (solid lines) and that of CIy  
462 (dashed lines) each were similar for initial and corrective submovements, with the zero phase of CIx  
463 occurring about 150 ms before the peak speed while CIy lagged CIx with an approximately  $\pi/2$  phase lag,  
464 with the zero crossing occurring around peak speed. The slope of the phase for corrective movements  
465 was slightly steeper indicating that neural activity cycled slightly faster for corrective movements than  
466 initial. Histograms of the phase of CIx and of CIy at peak speed on individual trials are shown in Figure  
467 6B. The distributions of phases of CIx and CIy were significantly non-uniform for both monkeys and the  
468 means and standard deviations are given in Table 2. Thus, there was a clear relationship between peak  
469 speed and the phase of condition-independent activity that occurred with almost all submovements, both  
470 initial and corrective, and had similar timing.

471

472

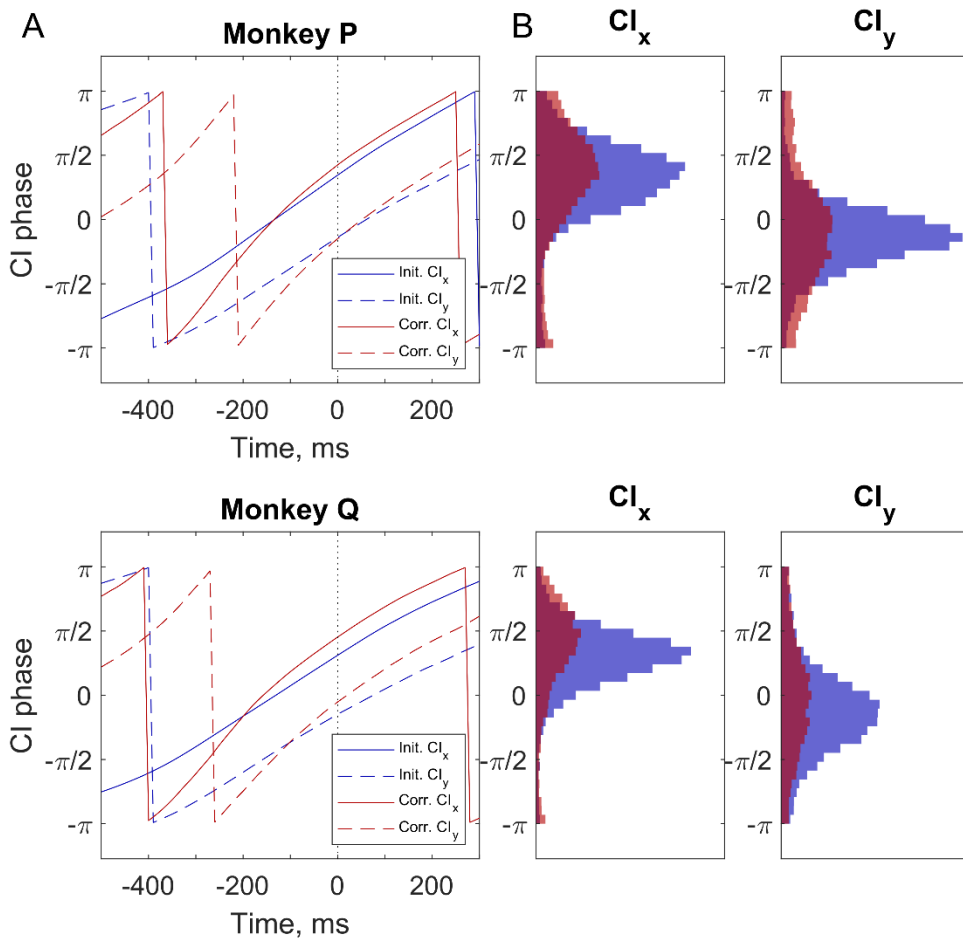

473

474 Figure 6. Phase of  $CI_x$  and  $CI_y$  relative to peak cursor speed. A) Phase of  $CI_x$  (solid lines) and  $CI_y$   
475 (dashed lines) time-aligned to peak speed (Time = 0) and averaged for all initial (blue) and corrective  
476 (red) submovements. B) Histograms of the phase of  $CI_x$  and  $CI_y$  at the time of peak speed for initial  
477 (blue) and corrective (red) submovements. Means and standard deviations are given in Table 2.

478

479

480

481

482



483 Table 2. Means and standard deviations of the phase of CIx and CIy. All circular distributions of the  
484 phase of CIx and CIy were non-uniform (all  $p < 0.001^d$ ).

| Monkey P   | CIx Mean   | CIx Std. dev | CIy Mean    | CIy Std. dev |
|------------|------------|--------------|-------------|--------------|
| Initial    | $0.35 \pi$ | $0.26 \pi$   | $-0.14 \pi$ | $0.23 \pi$   |
| Corrective | $0.43 \pi$ | $0.33 \pi$   | $-0.15 \pi$ | $0.36 \pi$   |
| Monkey Q   |            |              |             |              |
| Initial    | $0.31 \pi$ | $0.22 \pi$   | $-0.15 \pi$ | $0.30 \pi$   |
| Corrective | $0.45 \pi$ | $0.31 \pi$   | $-0.05 \pi$ | $0.37 \pi$   |

485

486 Because the phase in the CI plane appeared to define the neural dynamics and predict upcoming  
487 speed peaks, we created a metric we call the condition-independent phase (CI $\phi$ ) by averaging the phase of  
488 CIx and phase of CIy +  $\pi/2$  to calculate the current phase in the CI plane. We then examined the  
489 continuous relationship between cursor speed and neural CI $\phi$ . In figure 7A, we have plotted the cursor  
490 speed as a function of CI $\phi$ . While the CI $\phi$  is an angle that ranges between  $\pm\pi$  radians when calculated,  
491 for purposes of display here we have incremented CI $\phi$  in steps of  $2\pi$  to show how successive cycles of  
492 neural activity (abscissa) were related to movement speed (ordinate) as individual trials progressed  
493 through both initial and subsequent corrective submovements. The individual trials for monkey P in  
494 Figure 7A are the same as the trials shown in Figure 2B. However, the speed traces have now been  
495 stretched or condensed in time based on the current brain state measured with the CI $\phi$ . This plot now  
496 shows that the speed of movement varied with the cyclic neural activity with the cursor speeds for most  
497 trials rising and falling in  $2\pi$  cycles of CI $\phi$ . Both the speed averaged across all trials (white) and the non-  
498 uniform occurrence of peak speeds in individual trials (black) demonstrate that movement speed was  
499 consistently correlated with the cycles of condition-independent neural activity. The statistically  
500 significant circular correlation between speed and CI $\phi$  was 0.44 [0.39,0.53] and 0.42 [0.35,0.50]

501 ( $p < 0.001^e$  for both animals) with the largest speeds occurring at  $CI\phi = 0.32\pi$  and  $0.31\pi (+2k\pi)$  for  
502 monkeys P and Q, respectively.

503 Finally, we examined the predictive power of  $CI\phi$  for estimating when the peak speed occurred.  
504 Figure 7B illustrates the distribution of the time at which  $CI\phi = 0$  relative to the time of peak speed for  
505 initial submovements (top) and corrective submovements (bottom). These distributions consistently  
506 peaked 100-150 ms before the speed peak for both initial and corrective submovements. Corrective  
507 movements had  $CI\phi = 0$  at times slightly closer to peak speed indicating that the time delay to peak speed  
508 was slightly less for corrective movements. A relatively consistent relationship between neural activity in  
509 the  $CIx/CIy$  plane and peak speed was present for both initial and corrective submovements across all  
510 trials regardless of target size or reach direction.

511 To examine if incorporating neural dynamics significantly improved prediction, we compared our  
512  $CI\phi$  predictions with these population dynamics to predictions using a standard approach of using the  
513 instantaneous firing rate of all units to predict peak speeds. For predictions with the instantaneous firing  
514 rates, we built a linear regression model to estimate speed with a weighted sum of the instantaneous firing  
515 rate (a single neural dimension) of all spiking units (see Methods). Using this model, we estimated the  
516 time when the peak in firing rate in the neural dimension occurred that predicted the upcoming speed  
517 peak. Figure 7C shows the temporal distributions of these peak firing rates relative to peak speed for  
518 both initial and corrective submovements. Like the distributions using the dynamical model above  
519 (Figure 7B), the firing rate model peaked 150 to 100 ms before peak speed. The peaks were broader by  
520 10-20 ms, however, as characterized by the greater standard deviations ( $\sigma$ ) given for each distribution.  
521 The standard deviations were significantly different in all cases—initial and corrective for both monkeys  
522 (Table 2). Furthermore, although  $\geq 84\%$  of submovements were included in each of these distributions  
523 (percentages given in Fig. 7), a small fraction of submovements could not be aligned, lacking a  $CI\phi = 0$  in  
524 the dynamical systems model and/or a peak in the firing rate model within the -300 to 100 ms time  
525 window examined. The percentage of these unaligned trials was consistently smaller for the dynamical

526 systems model. Compared to using only the instantaneous/synchronous firing rates in a single neural  
 527 dimension, using the cyclic/asynchronous dynamics of the neural population significantly improved the  
 528 accuracy and consistency with which the time of peak speed could be predicted.

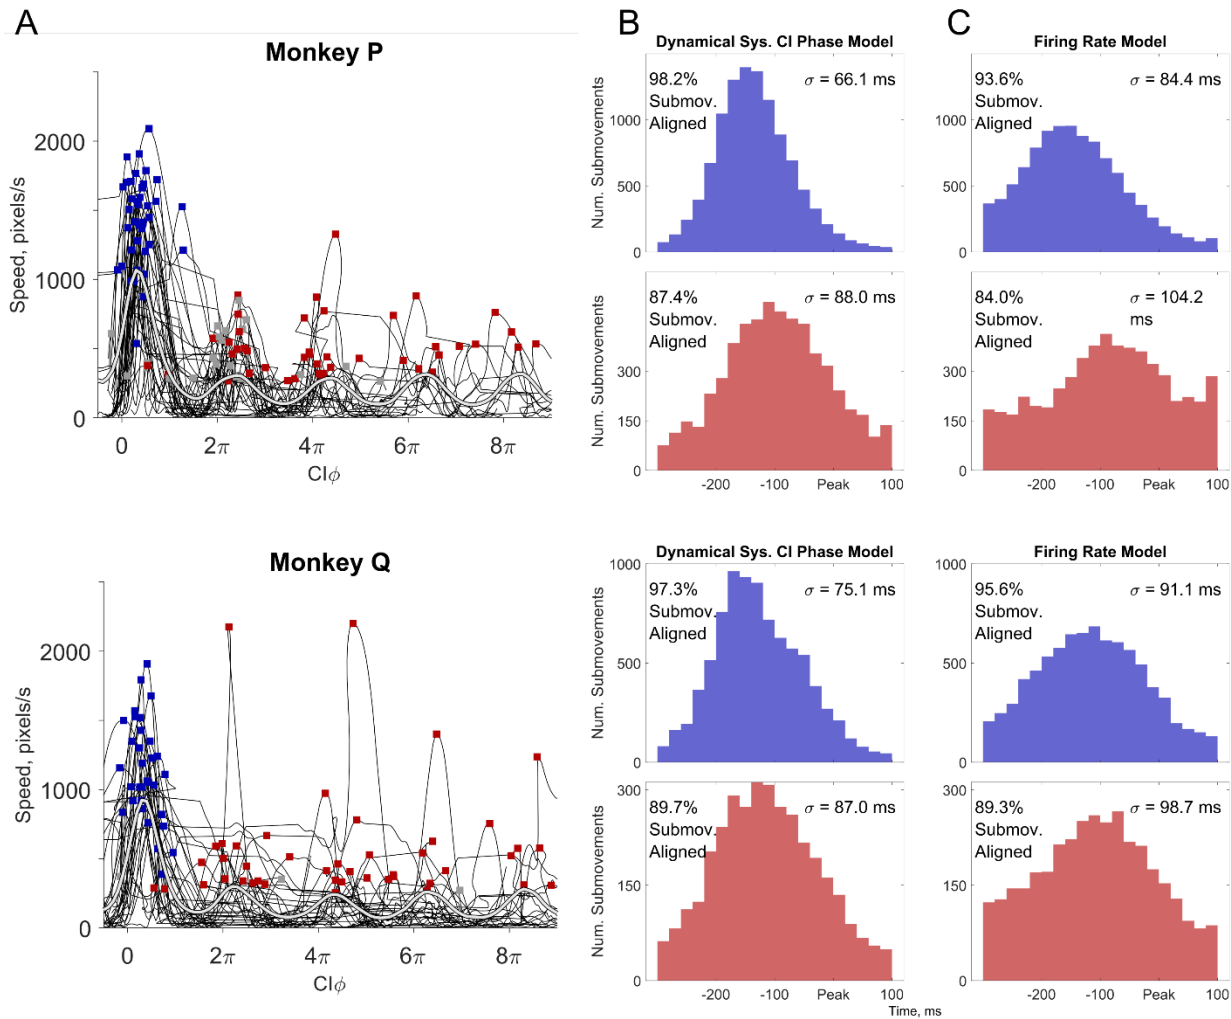

529  
 530 Figure 7. Relationship between  $CI\phi$  and cursor speed. A) Cursor speed is plotted as a function of  $CI\phi$  for  
 531 200 trials with at least one corrective submovement. The average speed of all trials as a function of  $CI\phi$   
 532 is shown in white, illustrating the oscillation in cursor speed depending on the phase of neural activity.  
 533 The circular correlations between  $CI\phi$  and cursor speed for all corrective trials were 0.44 [0.39, 0.53] and  
 534 0.43 [0.36, 0.50] for monkeys P and Q, respectively,  $p < 0.001^e$  in both cases. Note, the unwrapped  $CI\phi$  is  
 535 not always a monotonically increasing value as occasionally the neural activity could reverse and move  
 536 clockwise rather than counter-clockwise in the neural plane shown in Figure 6B.

537 B & C) Identifying the times of peak speeds with a dynamical systems model (B) or with an  
 538 instantaneous firing rates (C). The time point when  $CI\phi = 0$  (B) or peak firing rate (C) was used as a  
 539 prediction of the upcoming submovement. Each histogram shows only those submovements for which  
 540 the neural data aligned with the movement data, i.e.  $CI\phi = 0$  (B) or maximum firing rate (C) occurred  
 541 within the time range examined (-300 to 100 ms relative to submovement peak speed). The percentage of  
 542 total aligned trials is shown for each distribution as well as the standard deviation ( $\sigma$ ) for the aligned  
 543 trials. In all cases, the dynamical systems model predictions were more precise, with a narrower standard  
 544 deviation (statistics in Table 3) and fewer unaligned trials.

545

546 Table 3. Comparison of predication accuracy as measured with standard deviation in predictions using  
 547 the dynamical system  $CI\phi$  model vs. an instantaneous firing rate model.

|                   | $\sigma_1$ ,<br>$CI\phi$ ,<br>(ms) | $\sigma_2$ ,<br>Firing<br>Rate<br>(ms) | F-stat,<br>$\frac{\sigma_1^2}{\sigma_2^2}$ | 95%<br>Confid.<br>interval | Data<br>Comparison                                                                                           | Statistical<br>Test                  |
|-------------------|------------------------------------|----------------------------------------|--------------------------------------------|----------------------------|--------------------------------------------------------------------------------------------------------------|--------------------------------------|
| <b>Initial</b>    |                                    |                                        |                                            |                            | All<br>submovements<br>with a<br>prediction<br>between<br>-300:100 ms,<br>assuming<br>normal<br>distribution | F-test <sup>f</sup> , all<br>p<0.001 |
| Monkey<br>P       | 66.1                               | 84.4                                   | 0.61                                       | [0.59,<br>0.64]            |                                                                                                              |                                      |
| Monkey<br>Q       | 75.1                               | 91.1                                   | 0.69                                       | [0.65,<br>0.71]            |                                                                                                              |                                      |
| <b>Corrective</b> |                                    |                                        |                                            |                            |                                                                                                              |                                      |
| Monkey<br>P       | 88.0                               | 104.2                                  | 0.71                                       | [0.68,<br>0.75]            |                                                                                                              |                                      |
| Monkey<br>Q       | 87.0                               | 98.7                                   | 2.06                                       | [0.73,<br>0.83]            |                                                                                                              |                                      |

548

549

## 550 Discussion

551 Our precision center-out task utilized small targets to elicit one or more corrective submovements  
 552 in many trials. We found a temporal relationship for both initial and corrective reaching movements with

553 cyclic, condition-independent neural activity. Rather than a single cycle of neural activity in the primary  
554 motor cortex occurring during each trial, the speed profiles of initial and corrective submovements each  
555 aligned with a cycle of neural activity, providing a useful neural marker encoding the series of  
556 submovements.

557 In our precision center-out task, the monkeys' movements showed consistent bell-shaped speed  
558 profiles. These speed profiles were evident for both the larger initial movement from the center toward  
559 the peripheral target as well as for each subsequent corrective movement. A large majority of both initial  
560 and corrective submovements had durations of 100-350 ms, with a low-speed trough separating almost all  
561 submovements. Discrete submovements defined by multiple speed peaks have previously been described  
562 in behavioral studies of reaching (Pratt et al., 1994; Lee et al., 1997; Hatsopoulos et al., 2007; Polyakov et  
563 al., 2009), turning a knob (Novak et al., 2000), isometric contractions (Massey et al., 1992; Hall et al.,  
564 2014), and object manipulation for tactile discrimination (Pruszynski et al., 2018). The experimental  
565 results and analysis presented here provide new evidence of a relationship between condition-independent  
566 neural dynamics and such behaviorally observed submovements.

#### 567 *Condition-independent phase predictive of cursor speed*

568 Churchland et al. (2012) originally described a single cycle of condition-dependent rotational  
569 dynamics in the activity of neurons in the primary motor and premotor cortex during both straight reaches  
570 and curved reaches around obstacles. More recently, Zimnik and Churchland (2021) demonstrated two  
571 repeated cycles of neural activity, each shortened in time, when a pair of movements were simultaneously  
572 instructed to be performed in rapid succession. Here, by focusing on the shifting dimensions of  
573 condition-independent neural activity with time, we identified that cycles of neural activity appear not  
574 only for initially planned reaches but also for the highly variable, corrective submovements that are made  
575 online with visual feedback. Our results highlight that the various time lags between individual cortical  
576 neurons' firing and the upcoming reaching movements are conserved, whether large and instructed or  
577 small and made online with feedback.

578 *Similar but smaller cyclic, condition-independent activity for corrective movements*

579           Although the orientation and direction of rotation through the identified condition-independent  
580 neural dimensions was similar for initial and corrective submovements, the magnitude of the condition-  
581 independent neural activity that occurred for corrective submovements was approximately one-third to  
582 one-half the magnitude of that for the initial submovements (both in average firing rate, Fig. 4A, and  
583 within our identified rotational CI plane, Fig. 5). On average, the encoding of movement speed is clearly  
584 present in primary motor cortex (Moran and Schwartz, 1999; Paninski et al., 2004), and the smaller  
585 change in average firing rate observed here during corrective movements reflected the lower movement  
586 speed for the corrective compared to the initial submovements, suggesting speed tuning in the magnitude  
587 of the condition-independent activity. This does not imply, however, that each individual trial and each  
588 individual neuron have proportionally smaller changes of firing rate during smaller amplitude  
589 movements. Examination of small, instructed movements has shown that a fraction of primary motor  
590 cortex neurons have similar firing rates for small, precise and for larger wrist movements while others are  
591 selective for only larger movements (Fromm and Evarts, 1981). We too observed similar large changes in  
592 firing rate on individual corrective submovements for certain neurons (data not shown). Only when  
593 averaging firing rates—time aligned to the peak movement speed or the decoded condition-independent  
594 phase—were the population differences in firing rate modulation between initial and corrective  
595 movements readily apparent. Precisely identifying encoded speed on a trial-by-trial basis with the neural  
596 activity remains challenging as there are often large changes of firing rates for individual neurons that are  
597 variable and idiosyncratic during any particular corrective submovement.

598           Our results highlight that condition-independent neural signals can evolve in time along with the  
599 neural dynamics that are related to task conditions. Adding condition-independent activity to condition-  
600 dependent activity has been suggested to make brain dynamics more robust to noise by increasing the  
601 differences in neural signals even when the muscle activation pattern at certain time points are very  
602 similar (Russo et al., 2018). In the context of precise, corrective movements, we speculate cyclic brain

603 dynamics can be used to organize neural activity that creates distinct submovements with time-varying  
604 neural and musculoskeletal dynamics that are more reliable for motor control. Previous reports of neural  
605 activity defining submovements linked together have used the term movement fragments (Hatsopoulos et  
606 al., 2007). In the context of precise movements, we hypothesize that organizing movement into  
607 submovements or movement fragments might allow the control of particular submovements to have  
608 different encoding features, neural processing, or control policies, for instance, allowing the large initial  
609 movements to be larger amplitude and less precise while the corrective submovements are smaller and  
610 more precise. Further studies will be needed to understand the condition-dependent differences that  
611 accompany the condition-independent neural features presented here.

612       Though various time lags in different neurons seem likely to be present across many tasks, cyclic,  
613 condition-independent neural dynamics may not be similar for all upper extremity movements. For  
614 instance, whereas during combined reach-and-grasp movements cyclic condition-independent activity  
615 occurs along with more complex condition-dependent dynamics (Rouse and Schieber, 2018), during  
616 separate reaching movements and grasping movements condition-dependent activity was cyclic during  
617 reaching, but was more complex during grasping (Suresh et al., 2020). The neural signals in a given  
618 hemisphere for cyclic movements of the contra- and ipsilateral arms have also have been reported to be in  
619 orthogonal subspaces (Ames and Churchland, 2019). Cyclic neural activity may not be due only to  
620 intrinsic neural dynamics in M1, but also the result of sensorimotor feedback control and/or a cognitive  
621 strategy. With sufficient time delay between each submovement, the neural activity could fit both  
622 descriptions. Observations of additional submovements defined by second or third speed peaks do not  
623 necessarily require a feedback controller with discrete updates. A single, continuous optimal feedback  
624 controller with appropriate delays and signal dependent noise can generate additional submovements with  
625 multiple, sequential speed peaks (Li et al., 2018). Results by Susilaradeya et al. (2019) argue that  
626 extrinsic effects of a task interact with the intrinsic dynamics of the brain in a manner consistent with an  
627 optimal feedback controller, possibly providing a framework for assessing these effects across a variety of

628 tasks including our precision center-out task. Further work examining neural activity in various tasks  
629 and/or additional sensorimotor brain areas will be needed to advance our understanding of the neural  
630 dynamics of the sensory processing, cognitive planning, and motor execution for precise, corrective  
631 movements.

632         The cyclic dynamics of corrective movements have important implications for brain-computer  
633 interfaces (BCIs). To date, most BCI decoders are time-invariant, not recognizing when submovements  
634 occur. Decoders are typically first constructed from observed or imagined movements that assume single,  
635 straight-line movements. When algorithms for updating BCI decoders consider the change in movement  
636 direction for corrective movements, it typically has been assumed the intended path is updated  
637 continuously (Gilja et al., 2012; Shanechi et al., 2016). Experiments have suggested that BCI control can  
638 be improved with two states: active control and rest (Kim et al., 2011; Williams et al., 2013, 2016; Sachs  
639 et al., 2016). Our results suggest that computing the phase of cyclic, condition-independent neural  
640 activity with  $CI\phi$  (Fig. 7B) can provide better prediction of the timing of corrective submovements than  
641 using the instantaneous firing rates alone (Fig. 7C). This may lead to BCIs that allow the subject to better  
642 signal when they intend to make a corrective movement. With additional information about the typical  
643 neural dynamics and kinematics of submovements, BCI decoders may better estimate natural kinematics  
644 from noisy neural signals. Taking into account the cyclic dynamics of the condition-independent neural  
645 activity may also lead to better descriptions of the condition-dependent activity that encodes task features.  
646 For example, direction encoding has been shown to shift progressively during a single movement (Sergio  
647 and Kalaska, 1998; Churchland and Shenoy, 2007; Suminski et al., 2015; Suway et al., 2017). Accounting  
648 for the phase of a movement with its cyclic, condition-independent activity (i.e.  $CI\phi$ ) could enable  
649 decoders of movement direction that shift progressive during a single movement. Such improvements  
650 could lead to a more robust description of the neural encoding of precise and corrective movements.

651



652 Extended Data 1. Matlab code to calculate the  $CI\phi$  is available on Github.

653           Since the trial data contains corrective movements in addition to the large initial movements that  
654 were not precisely time aligned to trial events for averaging condition-independent neural activity, we  
655 developed a novel algorithm to iteratively average the firing rates, calculate  $CI\phi$ , then average the firing  
656 rates again based on the  $CI\phi$ . This iterative process involves three steps: i) Each unit's firing rate is  
657 averaged across all trials to determine its condition-independent firing rate. ii) Dimensionality reduction  
658 is performed using PCA and jPCA on the condition-independent firing rates to identify the neural plane  
659 with the most rotational/cyclic condition-independent activity. iii) The instantaneous phase is calculated  
660 using the Hilbert transform on the first two jPC dimensions for all data points. Matlab code is available  
661 on GitHub. Further details are available in the Readme document attached to the code.

662

663

664 **References**

- 665 Abrams RA, Meyer DE, Kornblum S (1990) Eye-hand coordination: oculomotor control in rapid aimed  
666 limb movements. *J Exp Psychol Hum Percept Perform* 16:248–267.
- 667 Ames KC, Churchland MM (2019) Motor cortex signals for each arm are mixed across hemispheres and  
668 neurons yet partitioned within the population response. *Elife* 8:1–36.
- 669 Ashe J, Georgopoulos AP (1994) Movement parameters and neural activity in motor cortex and area 5.  
670 *Cereb Cortex* 6:590–600.
- 671 Berens P (2009) CircStat : A MATLAB Toolbox for Circular Statistics. *J Stat Softw* 31:1–21.
- 672 Cheney PD, Fetz EE (1980) Functional classes of primate corticomotoneuronal cells and their relation to  
673 active force. *J Neurophysiol* 44:773–791.
- 674 Churchland MM, Cunningham JP, Kaufman MT, Foster JD, Nuyujukian P, Ryu S, Shenoy K V (2012)  
675 Neural population dynamics during reaching. *Nature* 487:51–56.
- 676 Churchland MM, Shenoy K V (2007) Temporal complexity and heterogeneity of single-neuron activity in  
677 premotor and motor cortex. *J Neurophysiol* 97:4235–4257.
- 678 Craik KJW (1947) Theory of the human operator in control systems. I. the operator as an engineering  
679 system. *Br J Psychol* 38:56–61.
- 680 Cunningham JP, Yu BM (2014) Dimensionality reduction for large-scale neural recordings. *Nat Neurosci*  
681 17:1500–1509.
- 682 Elliott D, Hansen S, Grierson LE, Lyons J, Bennett SJ, Hayes SJ (2010) Goal-Directed Aiming: Two  
683 Components but Multiple Processes. *Psychol Bull* 136:1023.
- 684 Evarts E V (1968) Relation of pyramidal tract activity to force exerted during voluntary movement. *J*  
685 *Neurophysiol* 31:14–27.

- 686 Fromm C, Evarts E V (1981) Relation of size and activity of motor cortex pyramidal tract neurons during  
687 skilled movements in the monkey. *J Neurosci* 1:453–460.
- 688 Georgopoulos AP, Kalaska JF, Caminiti R, Massey JT (1982) On the relations between the direction of  
689 two-dimensional arm movements and cell discharge in primate motor cortex. *J Neurosci* 2:1527–  
690 1537.
- 691 Gilja V, Nuyujukian P, Chestek CA, Cunningham JP, Yu BM, Fan JM, Ryu S, Shenoy K V (2012) A  
692 brain machine interface control algorithm designed from a feedback control perspective. *Conf Proc*  
693 *IEEE Eng Med Biol Soc* 2012:1318–1322.
- 694 Hall TM, de Carvalho F, Jackson A (2014) A common structure underlies low-frequency cortical  
695 dynamics in movement, sleep, and sedation. *Neuron* 83:1185–1199.
- 696 Hatsopoulos NG, Xu Q, Amit Y (2007) Encoding of movement fragments in the motor cortex. *J Neurosci*  
697 27:5105–5114.
- 698 Hill DN, Mehta SB, Kleinfeld D (2011) Quality metrics to accompany spike sorting of extracellular  
699 signals. *J Neurosci* 31:8699–8705.
- 700 Jackson A, Gee VJ, Baker SN, Lemon RN (2003) Synchrony between Neurons with Similar Muscle  
701 Fields in Monkey Motor Cortex. *Neuron* 38:115–125.
- 702 Kakei S, Hoffman DS, Strick PL (1999) Muscle and movement representations in the primary motor  
703 cortex. *Science* (80- ) 285:2136–2139.
- 704 Kalaska JF, Cohen DAD, Hyde ML, Prud'homme M (1989) A comparison of movement direction-related  
705 versus load direction-related activity in primate motor cortex, using a two-dimensional reaching  
706 task. *J Neurosci* 9:2080–2102.
- 707 Kaufman MT, Seely JS, Sussillo D, Ryu SI, Shenoy K V, Churchland MM (2016) The largest response  
708 component in motor cortex reflects movement timing but not movement type. *eNeuro*

709 3:ENEURO.0085-16.2016.

710 Kihlberg JK, Herson JH, Schotz WE (1972) Square Root Transformation Revisited. *J R Stat Soc* 21:76–  
711 81.

712 Kim S-P, Simeral JD, Hochberg LR, Donoghue JP, Friehs GM, Black MJ (2011) Point-and-click cursor  
713 control with an intracortical neural interface system by humans with tetraplegia. *IEEE Trans neural*  
714 *Syst Rehabil Eng* 19:193–203.

715 Kobak D, Brendel W, Constantinidis C, Feierstein CE, Kepecs A, Mainen ZF, Qi XL, Romo R, Uchida  
716 N, Machens CK (2016) Demixed principal component analysis of neural population data. *Elife* 5:1–  
717 36.

718 Lebedev MA, Ossadtchi A, Mill NA, Urpí NA, Cervera MR, Nicolelis MAL (2019) Analysis of neuronal  
719 ensemble activity reveals the pitfalls and shortcomings of rotation dynamics. *Sci Rep* 9:1–14.

720 Lee D, Port NL, Georgopoulos AP (1997) Manual interception of moving targets. *Exp brain Res*  
721 116:421–433.

722 Li Z, Mazzoni P, Song S, Qian N (2018) A Single, Continuously Applied Control Policy for Modeling  
723 Reaching Movements with and without Perturbation. *Neural Comput* 30:397–427.

724 Liu Z, Schieber MH (2020) Neuronal activity distributed in multiple cortical areas during voluntary  
725 control of the native arm or a brain-computer interface. *eNeuro* 7:1–16.

726 Massey JT, Lurito JT, Pellizzer G, Georgopoulos AP (1992) Three-dimensional drawings in isometric  
727 conditions: relation between geometry and kinematics. *Exp Brain Res* 88:685–690.

728 Mathworks (2020) Natick, Massachusetts: The MathWorks Inc.

729 Maynard EM, Hatsopoulos NG, Ojakangas CL, Acuna BD, Sanes JN, Normann RA, Donoghue JP (1999)  
730 Neuronal interactions improve cortical population coding of movement direction. *J Neurosci*

- 731 19:8083–8093.
- 732 Michaels JA, Dann B, Scherberger H (2016) Neural Population Dynamics during Reaching Are Better  
733 Explained by a Dynamical System than Representational Tuning. *PLoS Comput Biol* 12:1–22.
- 734 Mollazadeh M, Aggarwal V, Davidson AG, Law AJ, Thakor N V, Schieber MH (2011) Spatiotemporal  
735 variation of multiple neurophysiological signals in the primary motor cortex during dexterous reach-  
736 to-grasp movements. *J Neurosci* 31:15531–15543.
- 737 Moran DW, Schwartz AB (1999) Motor Cortical Representation of Speed and Direction During  
738 Reaching. *J Neurophysiol* 82:2676–2692.
- 739 Novak KE, Miller LE, Houk JC (2000) Kinematic properties of rapid hand movements in a knob turning  
740 task. *Exp Brain Res* 132:419–433.
- 741 Paninski L, Fellows MR, Hatsopoulos NG, Donoghue JP (2004) Spatiotemporal tuning of motor cortical  
742 neurons for hand position and velocity. *J Neurophysiol* 91:515–532.
- 743 Polyakov F, Stark E, Drori R, Abeles M, Flash T (2009) Parabolic movement primitives and cortical  
744 states: Merging optimality with geometric invariance. *Biol Cybern* 100:159–184.
- 745 Pratt J, Chasteen AL, Abrams RA (1994) Rapid aimed limb movements: age differences and practice  
746 effects in component submovements. *Psychol Aging* 9:325–334.
- 747 Pruszynski JA, Flanagan JR, Johansson RS (2018) Fast and accurate edge orientation processing during  
748 object manipulation. *Elife* 7:e31200.
- 749 Rouse AG, Schieber MH (2016) Spatiotemporal Distribution of Location and Object Effects in Primary  
750 Motor Cortex Neurons during Reach-to-Grasp. *J Neurosci* 36:10640–10653.
- 751 Rouse AG, Schieber MH (2018) Condition-dependent neural dimensions progressively shift during reach  
752 to grasp. *Cell Rep* 25:3158–3168.

- 753 Russo AA, Bittner SR, Perkins SM, Seely JS, London BM, Lara AH, Miri A, Marshall NJ, Kohn A,  
754 Jessell TM, Abbott LF, Cunningham JP, Churchland MM (2018) Motor Cortex Embeds Muscle-like  
755 Commands in an Untangled Population Response. *Neuron* 97:953-966.e8.
- 756 Sachs NA, Ruiz-Torres R, Perreault EJ, Miller LE (2016) Brain-state classification and a dual-state  
757 decoder dramatically improve the control of cursor movement through a brain-machine interface. *J*  
758 *Neural Eng* 13:016009.
- 759 Sainburg RL, Ghez C, Kalakanis D (1999) Intersegmental dynamics are controlled by sequential  
760 anticipatory, error correction, and postural mechanisms. *J Neurophysiol* 81:1045–1056.
- 761 Sarma S V, Eden UT, Cheng ML, Williams ZM, Hu R, Eskandar E, Brown EN (2010) Using point  
762 process models to compare neural spiking activity in the subthalamic nucleus of parkinsons patients  
763 and a healthy primate. *IEEE Trans Biomed Eng* 57:1297–1305.
- 764 Sergio LE, Kalaska JF (1998) Changes in the Temporal Pattern of Primary Motor Cortex Activity in a  
765 Directional Isometric Force Versus Limb Movement Task. *J Neurophysiol* 80:1577–1583.
- 766 Shanechi MM, Orsborn AL, Carmena JM (2016) Robust Brain-Machine Interface Design Using Optimal  
767 Feedback Control Modeling and Adaptive Point Process Filtering. *PLoS Comput Biol* 12:1–29.
- 768 Snedecor G, Cochran W (1980) *Statistical Methods*, 7th ed. Ames, IA: Iowa State UP.
- 769 Suminski AJ, Mardoum P, Lillicrap TP, Hatsopoulos NG (2015) Temporal evolution of both premotor  
770 and motor cortical tuning properties reflect changes in limb biomechanics. *J Neurophysiol*  
771 113:2812–2823.
- 772 Suresh AK, Goodman JM, Okorokova E V., Kaufman MT, Hatsopoulos NG, Bensmaia SJ (2020) Neural  
773 population dynamics in motor cortex are different for reach and grasp. *Elife* 9:1–16.
- 774 Susilaradeya D, Xu W, Hall TM, Galán F, Alter K, Jackson A (2019) Extrinsic and intrinsic dynamics in  
775 movement intermittency. *Elife* 8:1–27.

- 776 Suway SB, Orellana J, McMorland AJC, Fraser GW, Liu Z, Velliste M, Chase SM, Kass RE, Schwartz  
777 AB (2017) Temporally Segmented Directionality in the Motor Cortex. *Cereb Cortex* 12:1–14.
- 778 Thach WT (1978) Correlation of Neural Discharge with Pattern and Force of Muscular Activity, Joint  
779 Position, and Direction of Intended Next Movement in Motor Cortex and Cerebellum. *J*  
780 *Neurophysiol* 41:654–676.
- 781 Trautmann EM, Stavisky SD, Lahiri S, Ames KC, Kaufman MT, O’Shea DJ, Vyas S, Sun X, Ryu SI,  
782 Ganguli S, Shenoy K V. (2019) Accurate Estimation of Neural Population Dynamics without Spike  
783 Sorting. *Neuron* 103:292-308.e4.
- 784 Truccolo W, Eden UT, Fellows MR, Donoghue JP, Brown EN (2005) A Point Process Framework for  
785 Relating Neural Spiking Activity to Spiking History, Neural Ensemble, and Extrinsic Covariate  
786 Effects. *J Neurophysiol* 96:1074–1089.
- 787 Williams JJ, Rouse AG, Thongpang S, Williams JC, Moran DW (2013) Differentiating closed-loop  
788 cortical intention from rest: building an asynchronous electrocorticographic BCI. *J Neural Eng*  
789 10:046001.
- 790 Williams JJ, Tien RN, Inoue Y, Schwartz AB (2016) Idle state classification using spiking activity and  
791 local field potentials in a brain computer interface. 2016 38th Annu Int Conf IEEE Eng Med Biol  
792 Soc:1572–1575.
- 793 Woodworth RS (1899) The accuracy of voluntary movement. *Psychol Rev* 3:1–119.
- 794 Yu BM, Kemere C, Santhanam G, Afshar A, Ryu S, Meng TH, Sahani M, Shenoy K V (2007) Mixture of  
795 trajectory models for neural decoding of goal-directed movements. *J Neurophysiol* 97:3763–3780.
- 796 Zimnik AJ, Churchland MM (2021) Independent generation of sequence elements by motor cortex. *Nat*  
797 *Neurosci* 24:412–424.
- 798
